# Supplementary material
Source: PubMed Central journal article supplement (PMC3322880)
Supplement: supp_M112.345041_jbc.M112.345041-1.pdf [file supp_M112.345041_jbc.M112.345041-1.pdf]

TABLE S1. Primers used in this study.

| Name                                            | Sequence                          | Enzyme  |
|-------------------------------------------------|-----------------------------------|---------|
| <b>DNA-binding assays</b>                       |                                   |         |
| flhA-pro1                                       | TTGTCCCTCTGGCACAATTC              |         |
| flhA-pro2                                       | AGCTAACTAAAGTAGAAAC               |         |
| fgrM-DB1                                        | TCTCATATGGAGACACCGAGGCTGCTCA      | NdeI    |
| fgrM-DB2                                        | TCTAAGCTTTGCAAGAGACGTGGAAATTAC    | HindIII |
| <b>Integration of the <i>fgrM</i> gene</b>      |                                   |         |
| fgrM-int1                                       | TCTCATATGGAGACACCGAGGCTGCTCA      | NdeI    |
| fgrM-int2                                       | TCTAAGCTTCTATGCAAGAGACGTGGAAATTAC | HindIII |
| <b>RT-PCR</b>                                   |                                   |         |
| fgrM-RTPCR1                                     | GCGGTTGAAGCGGTCGAGGAA             |         |
| fgrM-RTPCR2                                     | TCCGACTCCACCGTGCTCA               |         |
| flhA-RTPCR1                                     | TTCGTTGCCGTGGAGGAGAA              |         |
| flhA-RTPCR2                                     | ATGGCCAACACGGCGGTGGAC             |         |
| cheW1-RTPCR1                                    | TTCACCCTCCATGTCCATAACCA           |         |
| cheW1-RTPCR2                                    | ATGCAGAATGCACTGCAGACCA            |         |
| dcuB-RTPCR1                                     | GGTGCCGACACAGACCGTCA              |         |
| dcuB-RTPCR2                                     | ATGATGATGTTCTGGATCCA              |         |
| <b>Interruption of the <i>fgrM</i> gene</b>     |                                   |         |
| fgrM-int3                                       | TCTCTCGAGTCCGACTCCACCGTGCTCA      | NdeI    |
| fgrM-int4                                       | TCTAAGCTTTCGCGTTGAAGCGGTCGAGGAA   | HindIII |
| <b>Construction of histidine kinase mutants</b> |                                   |         |
| GHK1-1                                          | TCTCTAGACAGGTGTATGTGACCATC        | XbaI    |
| GHK1-2                                          | TCGAATTCAGGAATTCGTTTCATGTC        | EcoRI   |
| GHK1-3                                          | TCTAAGCTTACCGAGCGGCTCATCCGAC      | HindIII |
| GHK1-4                                          | TCTCTCGAGTGGCTCTCCCTCGTGGATGGGAA  | XhoI    |
| GHK2-1                                          | TCTCTAGAGCGGCTACAAGGTATTCA        | XbaI    |
| GHK2-2                                          | TCGAATTCCTGTTTTTCAGGAGTAGCTCCA    | EcoRI   |
| GHK2-3                                          | TCTAAGCTTTCGAAGACCTGGGACCGCTCA    | HindIII |
| GHK2-4                                          | TCTCTCGAGTCCCTCCCGTCGCGGCGTACGC   | XhoI    |
| GHK3-1                                          | TCTCTAGAACATCGCCGTGCTCCCCA        | XbaI    |
| GHK3-2                                          | TCGAATTCGCGTGGCACTGGATAACC        | EcoRI   |
| GHK3-3                                          | TCTAAGCTTTCGAGCTGGCCAATGTGA       | HindIII |
| GHK3-4                                          | TCTCTCGAGTTGGGTTGTTCCGTCCTCTTTGTC | XhoI    |
| GHK4-1                                          | TCTCTAGACCGGGAAATCCGCGAGGCA       | XbaI    |
| GHK4-2                                          | TCGAATTCCTCCATGAGATGAATGCA        | EcoRI   |
| GHK4-3                                          | TCTAAGCTTGTTCAGGAGGTACGGCAGAC     | HindIII |
| GHK4-4                                          | TCTCTCGAGCCTCGCTTCGCCCCGGAGGGGAA  | XhoI    |
| GHK5-1                                          | TCTCTAGATATCGTGACCAAGATGCA        | XbaI    |
| GHK5-2                                          | TCGAATTCCTGGAGAAAGAGCGAGA         | EcoRI   |
| GHK5-3                                          | TCTAAGCTTTCGGCCAGTCCCGCTACC       | HindIII |
| GHK5-4                                          | TCTCTCGAGGGTGGCTGCGCTGGGGAGGGCAA  | XhoI    |
| GHK6-1                                          | TCTCTAGAACAGGAACTCGTCTGAA         | XbaI    |
| GHK6-2                                          | TCGAATTCGAACGCCCTGCGCTTGAC        | EcoRI   |
| GHK6-3                                          | TCTAAGCTTGGCCGTCAACTGGAGGCACA     | HindIII |

|        |                                    |         |
|--------|------------------------------------|---------|
| GHK6-4 | TCTCTCGAGGCAGAGGGTGAAGTAAAAGGTA    | XhoI    |
| GHK7-1 | TCTCTAGACCAGAGTATCCACCTGATC        | XbaI    |
| GHK7-2 | TCGAATTCACCATTTTGACGATCAC          | EcoRI   |
| GHK7-3 | TCTAAGCTTCGTCTCAATGCGCAAGCA        | HindIII |
| GHK7-4 | TCTCTCGAGCTCAAGCAGATTGAGGTAATCAA   | XhoI    |
| GHK8-1 | TCTCTAGACTAGACCTGGCCTCGGGTA        | XbaI    |
| GHK8-2 | TCGAATTCCTCTTCGCCGGTGTGGCTC        | EcoRI   |
| GHK8-3 | TCTCTCGAGCCCGGTCAGAGTGAAATAAAACGTC | HindIII |
| GHK8-4 | TCTAAGCTTGGAAGACTGCGTCGAACAA       | XhoI    |
| Sp-fwd | TCGAATTCGCACAGGATGACGCCTAAC        | EcoRI   |
| Sp-rev | TCTAAGCTTGAAGCGGCGTCTGGCTTG        | HindIII |

**In vitro phosphorylation assays**

|         |                                   |         |
|---------|-----------------------------------|---------|
| GHK3-K1 | TCTCATATGGCCAGCAACGTAACCGAGCGGA   | NdeI    |
| GHK3-K2 | TCTCTCGAGTTGGGTTGTTCCGTCCTCTTTGTC | XhoI    |
| GHK4-R1 | TCTCATATGACCGAAAAGAACTGCGAC       | NdeI    |
| GHK4-R2 | TCTCTCGAGCTCGCGGATTTCCCGGTCCAC    | XhoI    |
| fgrM-R1 | TCTCATATGGAGACACCGAGGCTGCTCA      | NdeI    |
| fgrM-R2 | TCTAAGCTTGTGCTCGAGGCCCGCTTCAC     | HindIII |

---

Recognition sequences for restriction enzymes are underlined.

**TABLE S2. Histidine kinases conserved in *Geobacter* species.**

| Name | DL-1    | Domain organization |
|------|---------|---------------------|
| GHK1 | GSU0007 | Unknown-PAS-HK      |
| GHK2 | GSU0008 | REC-PAS-HK          |
| GHK3 | GSU0009 | Unknown-PAS-HK      |
| GHK4 | GSU0010 | REC-PAS-GAF-HK      |
| GHK5 | GSU0149 | REC-HK              |
| GHK6 | GSU1043 | Unknown-PAS-HK      |
| GHK7 | GSU1630 | Unknown-PAS-HK      |
| GHK8 | GSU2565 | HK                  |

Homology search was conducted by NCBI/BLAST (<http://blast.ncbi.nlm.nih.gov/Blast.cgi>).  
REC; receiver, HK; histidine kinase

# FIGURE S1

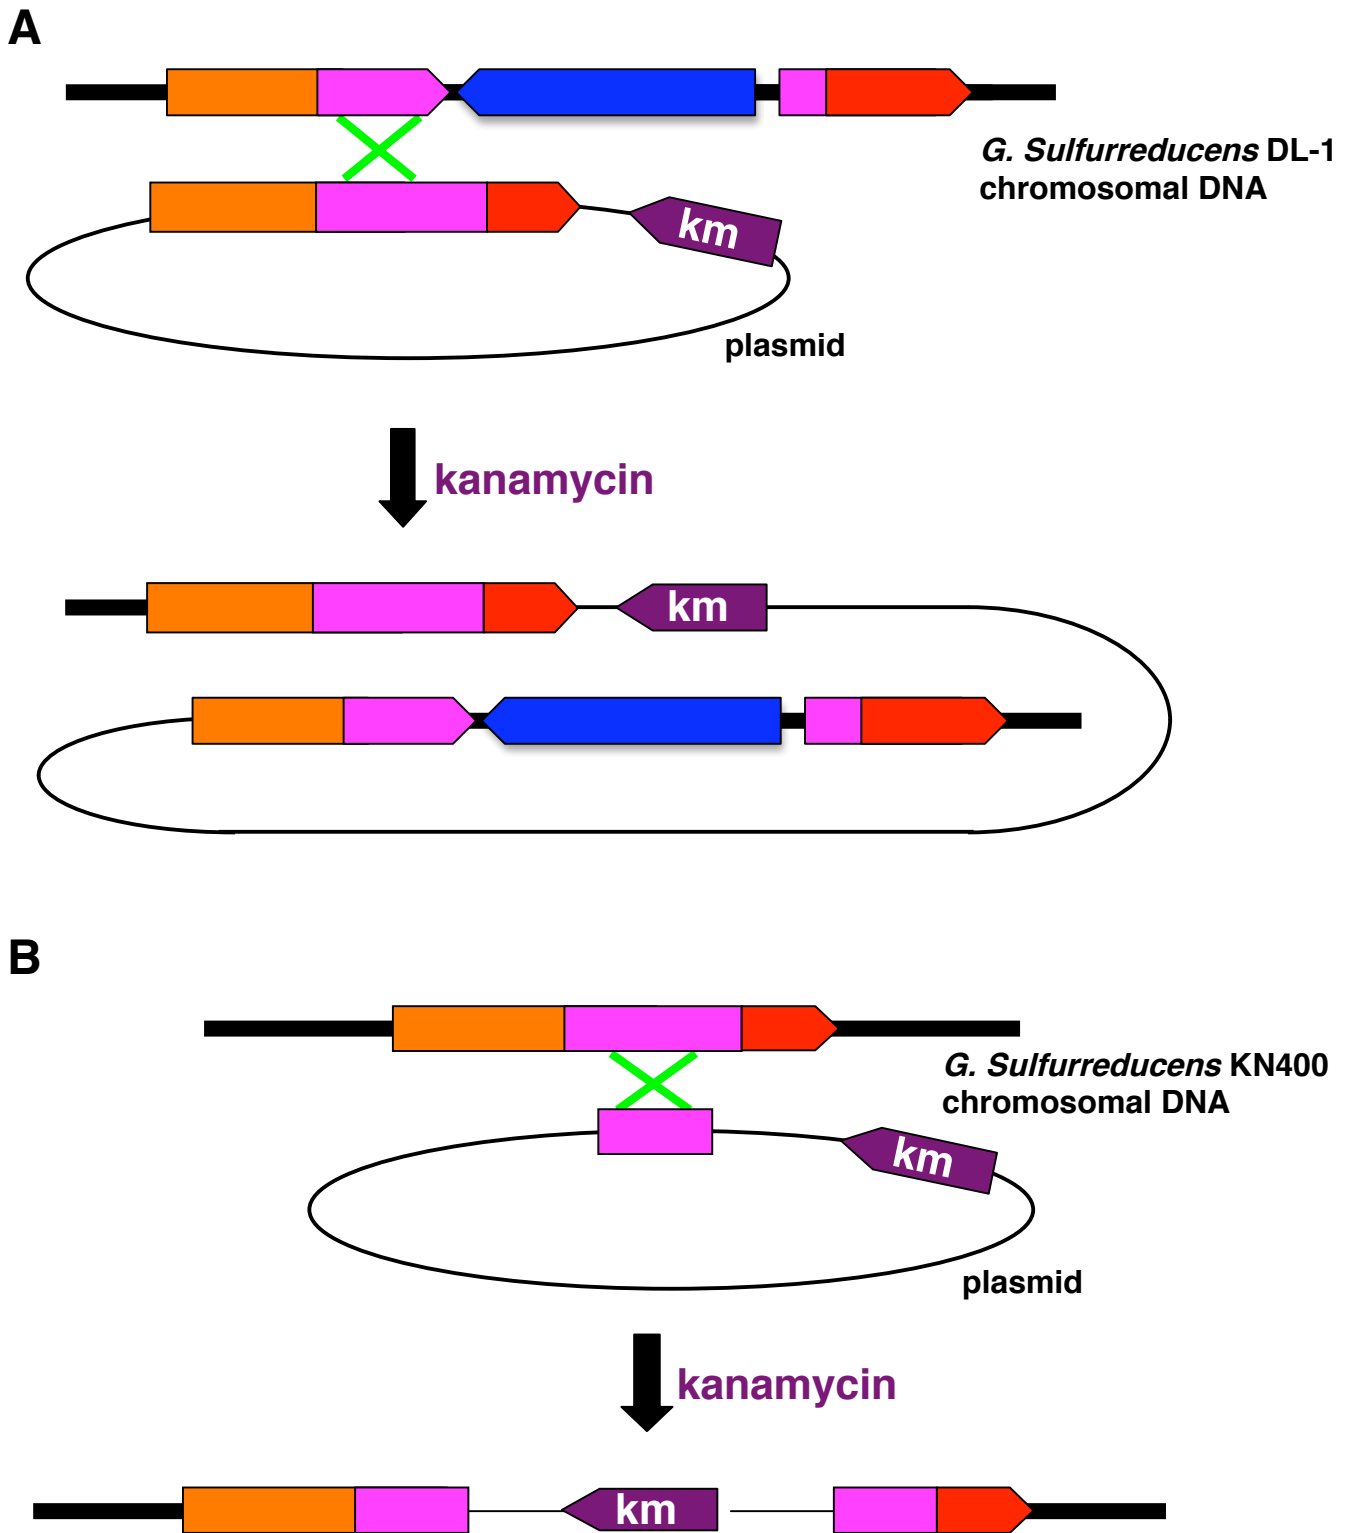

FIGURE S1. Schemes for genetic manipulation. A, Integration of the *fgrM* gene into *G. sulfurreducens* DL-1. B, Interruption of the *fgrM* gene in *G. sulfurreducens* KN400.

# FIGURE S2

## A

### flagella

*flhA* CTGGCACAACGGTTGCA  
*flgB* CTGGTACGGCTTTTGCT  
*fliL* CTGGCATTTCGGTTGCA  
*flgJ* TTGGCACATAACATGCT  
*fliD* GTGGAGCCGGTTTTGCA

### chemotaxis

*cheY1* CTGGAACAAAGTATGCA  
*mcp2* TTGGCTGAACAATTGCA

### others

*dcuB* TTGGTATCCCCCTTGCT  
*pilA* TTGGTTCGGCTTTTGCT  
*fdnG* TTGGCACAATGCTTGCC  
*nifH* TTGGCATGGACGGTGCT  
*gnfK* CTGGCATGCCTCGTGCC

**CONSENSUS** TGGCACGNNNNNTGCA  
 -24 -12

## B

*fliC* TTCTAAAGCTTTTTCCGGCTGCCGCCGATACGTG  
*fliD* CACTAAAGTTTTTCCCAGTCAGGTCGATACATA  
*flgJ* GGCTAAAGTTTTTTCAGAAGTTGGCCGATAGGTG  
*flaG* TGCTAAAGTTTCCCTGCAGTCATCCGATATGAG  
*flbD* AGCTAAAGTTTTCCGGTCCGCGGCCGAAACGAT  
*cheW1* TACTAAAATTTATGGACTCTTGCGCCGATGAGAA  
*cheY4* TGCTAAACGAAACGGGCAACCTGCCGATATGAA  
*mcp1* AGCTAAAGTCACAGCCATTTTGGTTCGATACTAA  
*mcp3* TGTAAAGGTCTGGGGAGGCCTGCCGATACAAT  
*mcp6* CCCTAAAGTATCGCCCTGATTGCGCCGATAACT  
*mcp7* TACTAAAGAAATATACATCTCTCTCGATAAGTA  
*mcp9* GGCTAAACTATCCGCCTTCCCCGCCGATACATT  
*mcp10* TACTAAACATTTTCTTACGACAGCCGATAAATT  
*mcp11* TCCTAAAGTTTGTAGTCGAACCGTGCCGATAGGGT  
*mcp13* GATTAAGTTTTTTCGGGATTGTGCCGAAATTAC  
*mcp15* ACCTAAAGTCAATCAGGAAAATCCCGATATGGA  
*mcp18* GGCTAAATATATTCACGTCTCAGTCGATGAGAT  
*mcp20* GATTAAGTAATCCGCGAATTTGTTCGATACGAT  
*mcp24* CGTTAAAGATGGGTGGCGGGCCGTGCAAGATA  
*mcp32* CCTTAAAGTTATTCGGGTATGCTCCGATACGCA  
*mcp33* TCATAAAGAATCTGCTTTGGTTGCCGATGTAGA  
*hrfP* TGCTAAAGTTTCCAACGGTTGTGCCGATAACTT  
**Consensus** GCTAAAGTTTT GCCGATA GA/T

FIGURE S2. Promoter elements in flagella-related genes in *G. sulfurreducens* DL-1. A, RpoN-dependent promoter elements. Highly conserved nucleotides are indicated in bold letters. RpoN-dependent promoter elements of *flgB*, *fliL*, *dcuB*, *fdnG*, *nifH*, *gnfK*, and *pilA* in *G. sulfurreducens* DL-1 were previously reported (Juárez *et al*, 2009; Leang *et al*, 2009; Ueki and Lovley, 2010), while those of *flhA*, *flgJ*, *fliD*, *cheY1*, and *mcp2* were predicted on the basis of the conservation of sequences in *Geobacter* species. Most of the flagella-related genes shown here appear to be the first gene of the operon. B, FliA-dependent promoter elements. FliA-dependent promoter elements were predicted on the basis of the conservation of sequences in *Geobacter* species. Some of them were previously predicted (Tran *et al*, 2008).

## FIGURE S3

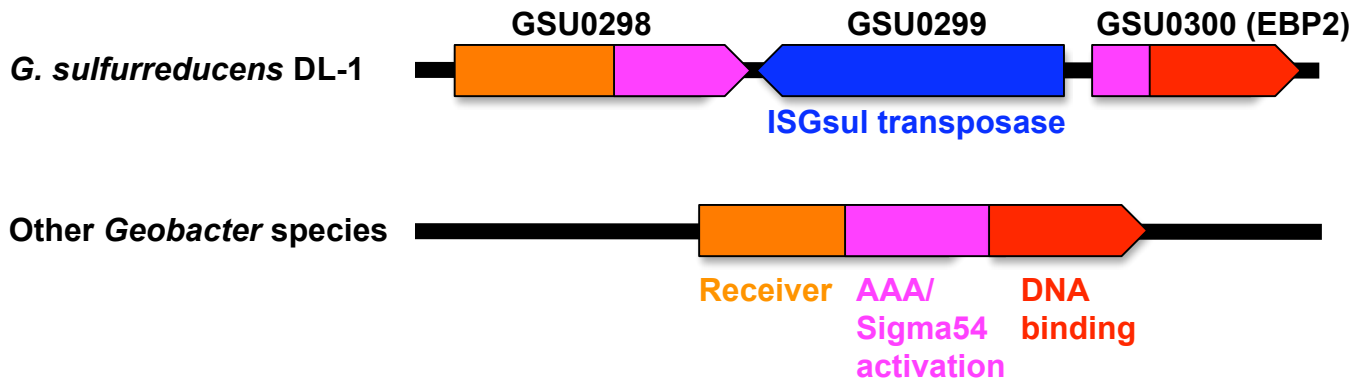

FIGURE S3. **Gene organization.** The gene encoding EBP2 in *G. sulfurreducens* DL-1 lacks a regulatory domain and most of a AAA/Sigma54 activation domain, while its homologues in other *Geobacter* species encode a typical enhancer-binding protein consisting of an N-terminal regulatory (receiver) domain, a central AAA/Sigma54 activation domain, and a C-terminal DNA-binding domain. In *G. sulfurreducens* DL-1, a gene encoding a regulatory domain and most of a AAA/Sigma54 activation domain that are homologous to those of the EBP2 homologues in other *Geobacter* species is located upstream of the gene encoding a transposase that is located upstream of the EBP2 gene.

# FIGURE S4

```

GDL1 (EBP2) -----
GDL1 (0298) METPRLLIADDDKKTRDFVTAFLKYKGYDVVQAFDGDQDALEKLEVEDVHLVITDLMMPRVNGLEFVKKLKAMRPGTVVIA
GKN400      METPRLLIADDDKKTRDFVAAFLKYKGYDVVQAFDGDQDALEKLEVEDVHLVITDLMMPRVNGLEFVKKLKAMRPGTVVIA
Gmet       MDTPRLLIADDDKKTRDFVAAFLKYKGYDVVQACDGDQDALDKLETEEVHLVITDLMMPRVNGLEFVKKLKTMRPGTVIIA
Gura       MDSARILLIADDDKKTRDFVAAFLSYKGYQVFQASDGDQDALEKIELNDVHMVITDLMMPRVNGLEFIKKLKAMRPEIVTIA
GFRC32     MESARILLIADDDKKTRDFVAAFLSYKGYQVFQAGDGDQDALEKIELNDVQMVITDLMMPRVNGLEFIKKLKAMRPEIVTIA
Gbem       METPKILLIADDDKKTRDFVAAFLSYKGYQVYQAFDGDQDALQKIELHEVQMVITDLMMPRVNGLEFIKQLKSIKRPDIVTIA
GM21       METPKILLIADDDKKTRDFVAAFLSYKGYQVYQAFDGDQDALQKIELHEVQMVITDLMMPRVNGLEFIKQLKSIKRPDIVTIA
                                                    *

GDL1 (EBP2) -----
GDL1 (0298) YSAFGNYEMTSNLLKAGVFFYLEKPFNLDELETHVKRGLHEHQSLQSQTYRSKPALKSRSLIPNIIGESPRMLSLFELIEK
GKN400      YSAFGNYEMTSNLLKAGVFFYLEKPFNLDELETHVKRGLHEHQSLQSQTYRSKPALKSRSLIPNIIGESPKMLSLFELIEK
Gmet       YSAFGNYEMASNLLKAGVFFYLEKPFNLDELETHVKRGLHEHQSLQSQTYRAKPAKLNRAIMPNIIGESSKMLSLFELIEK
Gura       YSAFANFEMTANLLKAGAFFYLEKPFNLEELETHVKRGLHEHQALQRQSEFKSKPCIKNRSLLNIIIGESDRMLSLFEMIEK
GFRC32     YSAFANYEMTANLLKAGAFFYLEKPFNLEELETHVKRGLHEHQTLQRQSEFKAKPCIKNRSLLNIIIGESEKMLSLFEMIEK
Gbem       YSAFANFEMTANLLKAGAFFYLEKPFNLEELETHVKRGLHEHQALQSKSFRSKPCIKNRALLNIIIGESEKMLSLFEMIEK
GM21       YSAFANFEMTANLLKAGAFFYLEKPFNLEELETHVKRGLHEHQALQSKSFRSKPCIKNRALLNIIIGESEKMLSLFEMIEK

GDL1 (EBP2) -----
GDL1 (0298) VAESDSTVLIQGESGTGKELVARAVHDLNKRNRNFVPVNC AAIPELLESELFGHVKGSFTGAIATRIGRFEMADKGTL
GKN400      VAESDSTVLIQGESGTGKELVARAVHDLNKRNRNFVPVNC AAIPELLESELFGHVKGSFTGAIATRIGRFEMADKGTL
Gmet       VAESDSTVLIQGESGTGKELVARAVHDLNKRNRNFVPVNC AAIPELLESELFGHVKGSFTGAVANRIGRFEMADRGTL
Gura       VAGSDSTVLIQGESGTGKELVARAIHDLNKRNRNFVPVNC AAIPELLESELFGHVKGSFTGAVATRIGRFEMADRGTL
GFRC32     VAGSDSTVLIQGESGTGKELVAKAIHDLNKRNRNFVPVNC AAIPELLESELFGHVKGSFTGAVATRIGRFEMADRGTL
Gbem       VATSDSTVLIQGESGTGKELVARAIHDLNKRNRNFVPVNC AAIPELLESELFGHVKGSFTGAVASRIGRFEMADKGTL
GM21       VATSDSTVLIQGESGTGKELVARAIHDLNKRNRNFVPVNC AAIPELLESELFGHVKGSFTGAVASRIGRFEMADKGTL

GDL1 (EBP2) -----
GDL1 (0298) FLDEIGDMKPNLQVKLLRVLQONRELEPVGATR SKKVDVRIIAATNQNLKLVASKQFREDLFYRISVIPFIPIPLRDRRE
GKN400      FLDEIGDMKPNLQVKLLRVLQONRELEPVGATR SKKVDVRIIAATNQNLKLVASKQFREDLFYRISVIPFIPIPLRDRRE
Gmet       FLDEIGDMKPNLQVKLLRVLQONRELEPVGATR SKKIDVRIIAATNQNLKLVATKQFREDLYYRISVIPFIPIPLRERKE
Gura       FLDEIGDMKPNLQVKLLRVLQONRELEPVGAARTKKVDVRIIAATNQNLKLVASKIFREDLYYRISVIPITLPLRERKT
GFRC32     FLDEIGDMKPNLQVKLLRVLQONRELEPVGAARTKKVDVRIIAATNQNLKLVASKIFREDLYYRISVIPIMLPLRERKS
Gbem       FLDEIGDMKANLQVKLLRVLQONRELEPVGSTRSKKVDVRIIAATNQNLKLVASKIFREDLYYRISVIPIMLPLRERGS
GM21       FLDEIGDMKANLQVKLLRVLQONRELEPVGSTRSKKVDVRIIAATNQNLKLVASKIFREDLYYRISVIPIMLPLRERGS

GDL1 (EBP2) MGQQWVNTFLDRFNRNKKSKVKGIDADAMEILCGYDWP GNVRELENLVERLVILKGFGLGVKDLPEKYTGVSLSA--PS
GDL1 (0298) DIPLLVNTTAVP-----
GKN400      DIPLLVNTFLDRFNRNKKSKVKGIDADAMEILCGYDWP GNVRELENLVERLVILKGFGLGVKDLPEKYTGVSLSA--PS
Gmet       DIPLLVNSFLERFNRNKKSKVKGIDSDAMDLLVHYDWP GNVRELENLVERLVILKGFGLGVKDLPEKFGVVTISP--PS
Gura       DIPLLNNFLEKFNKNKQKRVQSFDKNTMDILCNFDWP GNVRELENLVERLVILKGSGLTTFQDLPEKYRGIKSAP--KS
GFRC32     DVPLLNNFLEKFNKNKQKRVQSFDKNTMDILCNFDWP GNVRELENLVERLVILKGSGLTTFQDLPEKYRGIKSAG--KS
Gbem       DVPLLNSFLEKFNRSKQKRVQGFQDKQVMEILSNYDWP GNVRELENLVERLVIIKTTGVISIHDLPKYRGRSTTTVLHG
GM21       DVPLLNSFLEKFNRSKQKRVQGFQDKQVMEILSNYDWP GNVRELENLVERLVIIKTTGVISIHDLPKYRGRSTTTVLHG

GDL1 (EBP2) ETLALPDAGICLNTVVEEFENNLILQALKKTGGNKKEAALLNLKRTT LIEKLRKRLDVI STSLA
GDL1 (0298) -----
GKN400      ETLALPDAGICLNTVVEEFENNLILQALKKTGGNKKEAALLNLKRTT LIEKLRKRLDVI STSLA
Gmet       ESMTLPD SGICLNTVVEEFENNLILQALKKTGGNKKEAALLNLKRTT LIEKLRKRLDVI STSFA
Gura       ERLTLPD TGFLNSAVEDFENRLILQALEKTGGNKKEAALLNLKRTT LIEKLRKRLDVI STSFA
GFRC32     EQTLPD SGFLNSAVEDFENRLILQALEKTGGNKKEAALLNLKRTT LIEKLRKRLDVI STSFA
Gbem       EPMTLPD DGFLNSAVEDFENRLILQALEKSGGNKKEAALLNLKRTT LIEKLRKRLDVI STSFA
GM21       EPMTLPD DGFLNSAVEDFENRLILQALEKSGGNKKEAALLNLKRTT LIEKLRKRLDVI STSFA

```

FIGURE S4. Alignment of EBP2 homologues. The putative phosphorylation site (D, Asp) is indicated in red with an asterisk. GDL1; *G. sulfurreducens* DL-1, GKN400; *G. sulfurreducens* KN400, Gmet; *G. metallireducens*, Gura; *G. uraniireducens*, GFRC; *Geobacter* sp. FRC-32, Gbem; *G. bemidjiensis*, GM21; *Geobacter* sp. M21.

## FIGURE S5

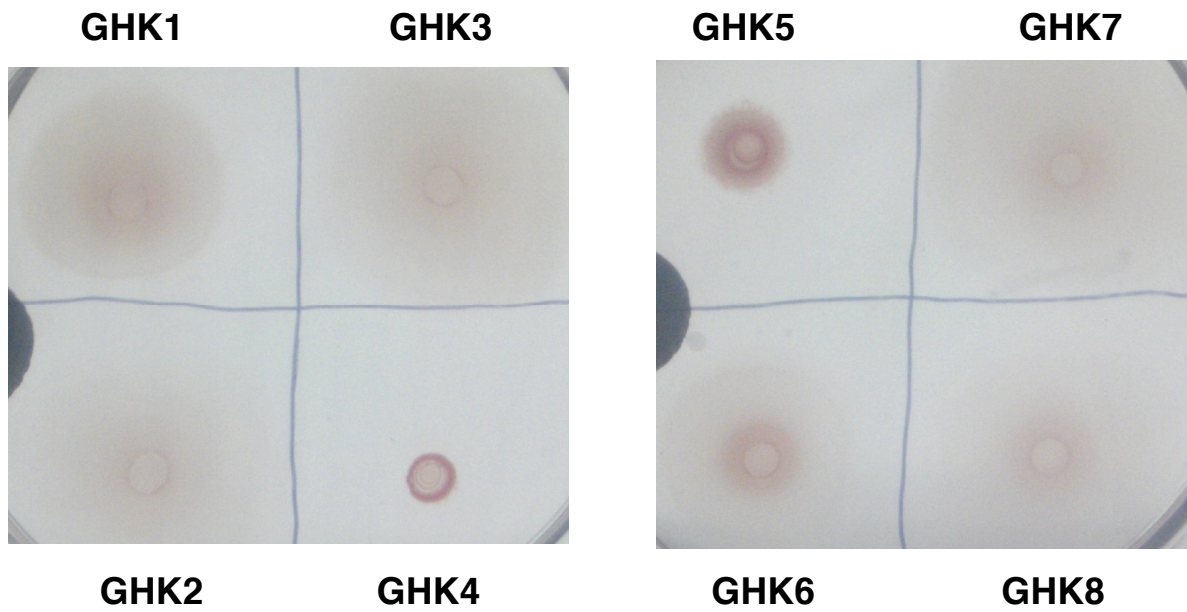

FIGURE S5. **Motility of mutants of histidine kinases conserved in *Geobacter* species.** Mutants were spotted on agar (0.3%) plates containing the NBAF medium and incubated for an extended period (8days).



## FIGURE S6

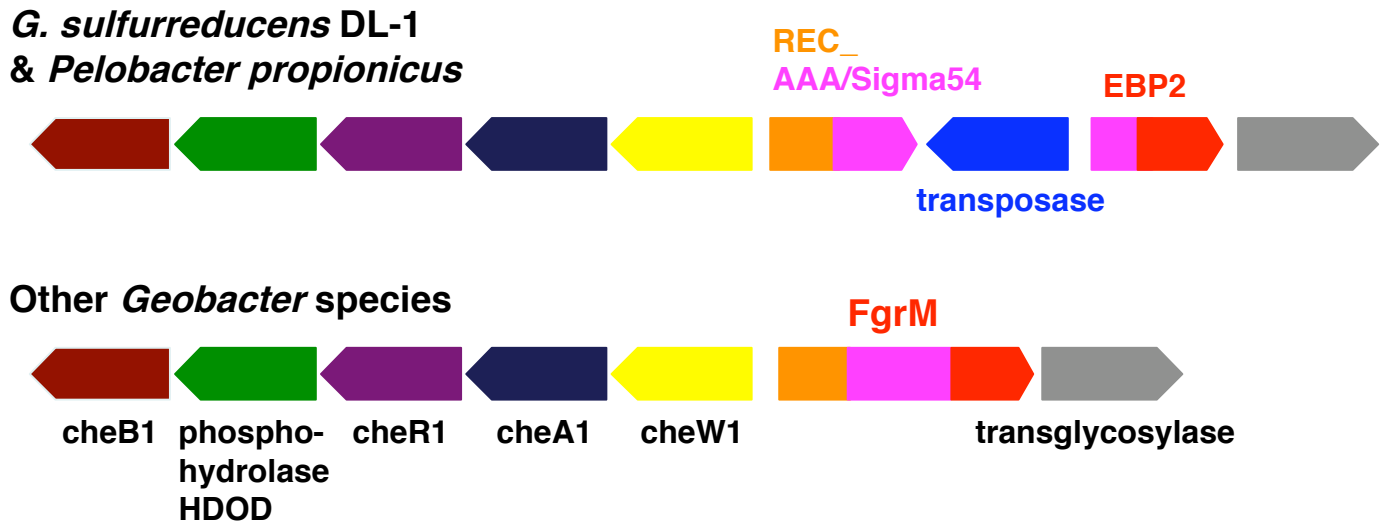

FIGURE S6. Arrangement of genes surrounding the *fgrM* gene. Genes surrounding the *fgrM* gene are conserved in *Geobacter* species. The same arrangement with that in *G. sulfurreducens* DL-1 is found in *Pelobacter propionicus*.

## Supplementary References

- Juárez K, Kim BC, Nevin K, Olvera L, Reguera G, Lovley DR, Methé BA. (2009) PilR, a transcriptional regulator for pilin and other genes required for Fe(III) reduction in *Geobacter sulfurreducens*. *J Mol Microbiol Biotechnol* **16**: 146-158.
- Leang C, Krushkal J, Ueki T, Puljic M, Sun J, Juárez K, Núñez C, Reguera G, DiDonato R, Poister B, Adkins RM, Lovley DR. (2009) Genome-wide analysis of the RpoN regulon in *Geobacter sulfurreducens*. *BMC Genomics* **10**: 331.
- Tran HT, Krushkal J, Antommattei FM, Lovley DR, Weis RM. (2008) Comparative genomics of *Geobacter* chemotaxis genes reveals diverse signaling function. *BMC Genomics* **9**: 471.
- Ueki T, Lovley DR. (2010) Novel regulatory cascades controlling expression of nitrogen-fixation genes in *Geobacter sulfurreducens*. *Nucleic Acids Res* **38**: 7485-7499.
